# Supplementary material for: Insights into the Steps of Breast Cancer–Brain Metastases Development: Tumor Cell Interactions with the Blood–Brain Barrier
Source: MDPI journal article supplement (doi:10.3390/ijms23031900), 2022-02-08
Supplement: s1 [file s1]

### **Flow cytometry**

For flow cytometry analysis  $2 \times 10^5$  cells were stained for E-selectin and VCAM1 in FACS tubes. Cells were washed once with PBS (+/+) (centrifuged for 5 min, 1200 rpm, 4°C) and stained with fluorochrome- conjugated antibody for 30 min at 4°C in the dark. After a washing step (PBS (+/+), centrifuged) cells were suspended in 500  $\mu$ l 1 % BSA (v/v)/ PBS (+/+), and measured with FACSCalibur (Becton Dickinson). The analysis was performed with FlowJoV10 Software.

- E-Selectin (E-Selectin-PE, Mouse Anti-Human CD62E, Clone: 68-5H11, BD Biosciences; diluted 1:100 with 1 % BSA (v/v)/PBS (+/+))
- VCAM1 (VCAM1-PE, #12-1069-41, ThermoFisher Scientific; diluted 1:25 with 1 % BSA (v/v)/PBS (+/+))
