# Supplementary material for: Insights into the Steps of Breast Cancer–Brain Metastases Development: Tumor Cell Interactions with the Blood–Brain Barrier
Source: Int J Mol Sci. 2022 Feb 8;23(3):1900. doi: 10.3390/ijms23031900 (PMC8836543; doi:10.3390/ijms23031900)
Supplement: Supplementary file 1 [file ijms-23-01900-s001.zip › Table S1.xlsx]

## Sheet: 1A Up-regulated genes
Supplementary Table S1A: Up-regulated genes in hBMECs only after treatment with CM of TNBC
Gene Symbol	Gene Description	hBMEC MDA-MB-231-BR vs. hBMEC Ø		hBMEC MDA-MB-231 vs. hBMEC Ø		hBMEC MCF-7 vs. hBMEC Ø
UP-REGULATED		log2foldchange	padj	log2foldchange	padj	log2foldchange	padj
Transcription/Translation regulation
CEBPD	CCAAT enhancer binding protein delta	4.14458	1.52152e-21	3.86127	1.17799e-18	0.30612	0.728744
ZNF385D	zinc finger protein 385D	3.81365	2.36108e-11	3.80119	2.57722e-11	0.814485	0.370338
NR5A2	nuclear receptor subfamily 5 group A member 2	2.59397	1.84981e-63	2.51623	1.03083e-59	0.609853	0.00206713
RELB	RELB proto-oncogene, NF-kB subunit	2.26581	6.0283e-31	2.15463	5.44761e-28	0.865599	0.000135656
MYCN	MYCN proto-oncogene, bHLH transcription factor	2.08652	1.19723e-12	2.14088	1.93012e-13	0.630175	0.114874
BACH2	BTB domain and CNC homolog 2	1.82102	3.35344e-14	1.78056	1.16224e-13	0.759938	0.00803927
BATF3	basic leucine zipper ATF-like transcription factor 3	1.7808	0.00465413	2.19194	0.000209757	-0.177603	0.880937
VGLL3	vestigial like family member 3	1.68034	4.73081e-33	1.66571	1.05192e-32	0.847856	4.96281e-08
HOXD1	homeobox D1	1.66734	0.000112345	1.65441	0.000117645	0.625899	0.271356
HDAC9	histone deacetylase 9	1.63685	2.56411e-69	1.59757	2.98733e-66	0.54234	3.82013e-07
EBF1	EBF transcription factor 1	1.46381	5.8511e-21	1.49785	3.41787e-22	0.759427	1.20797e-05
LONRF1	LON peptidase N-terminal domain and ring finger 1	1.45267	7.20782e-45	1.31939	6.73713e-37	0.883388	7.35769e-16
PRRX1	paired related homeobox 1	1.36588	0.000686272	1.25814	0.00192383	0.120043	0.864623
HOXB8	homeobox B8	1.27418	4.64045e-08	1.00154	3.21967e-05	0.00232046	0.9956
CNOT6L	CCR4-NOT transcription complex subunit 6 like	1.23592	8.90824e-66	1.08595	8.96028e-51	0.772308	1.0419e-25
ZC3H6	zinc finger CCCH-type containing 6 [Source:HGNC Symbol;Acc:HGNC:24762]	1.1922	4.6098e-36	1.12346	4.13604e-32	0.711021	1.54443e-12
BCL6	B cell CLL/lymphoma 6B	1.18955	1.31049e-50	1.30859	3.65509e-62	0.617924	2.8996e-13
ELL2	elongation factor for RNA polymerase II 2	1.1866	1.40508e-69	1.09552	2.49153e-59	0.547469	1.35965e-14
PATL2	PAT1 homolog 2	1.1098	0.0712616	1.28216	0.0262288	0.696917	0.327471
MITF	melanocyte inducing transcription factor	1.02437	1.17943e-17	1.13189	7.95937e-22	0.530028	5.55795e-05
Signal transduction
DKK2	dickkopf WNT signaling pathway inhibitor 2	5.19366	7.08765e-134	5.27499	1.78693e-138	2.73136	1.73698e-33
SOCS3	suppressor of cytokine signaling 3	2.39241	3.10677e-145	2.40494	2.34517e-147	0.636681	1.97688e-09
ARHGAP25	Rho GTPase activating protein 25	2.06902	0.0308207	1.83067	0.0599138	1.48482	0.165963
RND1	Rho family GTPase 1	1.69252	1.44083e-100	1.77798	1.43934e-112	0.961963	4.1654e-30
HGF	hepatocyte growth factor	1.66931	0.0379169	1.86405	0.0148915	0.274682	0.831018
HBEGF	heparin binding EGF like growth factor	1.54771	2.37684e-180	1.40591	3.83175e-148	0.817601	2.7088e-47
TNFAIP3	TNF alpha induced protein 3	1.48754	6.70367e-19	1.4908	4.1897e-19	0.893234	7.72895e-07
LPAR1	lysophosphatidic acid receptor 1	1.43725	0.000279369	1.28681	0.00134663	-0.959966	0.096443
CCDC68	coiled-coil domain containing 68	1.34983	5.88699e-14	1.14866	3.34492e-10	0.432104	0.0547014
IL2RB	interleukin 2 receptor subunit beta	1.34244	0.0539726	1.38901	0.0391455	0.238896	0.825683
SPRED2	sprouty related EVH1 domain containing 2	1.3313	6.16217e-34	1.13154	2.13418e-24	0.690598	5.74386e-09
TGFB3	transforming growth factor beta 3	1.32214	2.34019e-14	1.26118	3.701e-13	-0.113421	0.705914
DOK5	docking protein 5	1.21419	3.58864e-09	1.06494	3.47952e-07	0.326325	0.245687
FGF5	fibroblast growth factor 5	1.11604	2.39813e-06	1.30278	1.31989e-08	0.60154	0.0272852
MAP3K8	mitogen-activated protein kinase kinase kinase 8	1.09567	2.52418e-12	1.00462	1.79865e-10	-0.0545549	0.850304
IL34	interleukin 34	1.0769	5.52803e-05	1.11301	2.42318e-05	0.0987091	0.829892
SOCS2	suppressor of cytokine signaling 2	1.07146	2.62903e-07	1.03389	6.85076e-07	0.220837	0.467587
IL31RA	interleukin 31 receptor A	1.05536	0.000109387	1.06232	8.42556e-05	0.572223	0.0731976
RIN2	Ras and Rab interactor 2	1.00496	4.70739e-30	1.1303	5.27509e-38	0.73958	1.75192e-16
Cytokine signaling
CXCL8	C-X-C motif chemokine ligand 8	3.84663	9.52505e-86	3.27286	5.58668e-62	1.41008	1.06072e-11
CXCL2	C-X-C motif chemokine ligand 2	3.3843	8.85878e-38	2.92764	6.41927e-28	0.660703	0.0773757
CXCL3	C-X-C motif chemokine ligand 3	3.28731	1.86091e-14	2.8911	3.52194e-11	0.678415	0.308365
CXCL1	C-X-C motif chemokine ligand 1	3.26118	5.63893e-91	2.77195	1.01215e-64	0.376078	0.108115
CCL2	C-C motif chemokine ligand 27	2.98836	1.89147e-66	2.65957	1.44412e-52	0.252384	0.306186
CXCL6	C-X-C motif chemokine ligand 6	1.97036	0.0154558	2.08866	0.00805631	-0.219086	0.886839
CTF1	cardiotrophin 1	1.11446	0.00124544	1.00872	0.00384378	0.37634	0.417354
Cellcycle/Apoptosis
SPP1	centrosome and spindle pole associated protein 1	4.09383	4.41255e-22	3.90653	4.28212e-20	0.58175	0.425882
BIRC3	baculoviral IAP repeat containing 3	2.55202	3.28226e-08	2.25331	1.76849e-06	0.91884	0.137582
NUAK2	NUAK family kinase 2	1.68963	2.18173e-16	1.50473	4.82997e-13	0.37187	0.189111
BCL2A1	BCL2 related protein A1	1.68737	9.01496e-10	1.20295	3.66935e-05	0.462204	0.227199
CDC14A	cell division cycle 14A	1.55238	1.22061e-67	1.40288	6.49357e-55	0.925092	1.14894e-22
USP44	ubiquitin specific peptidase 44	1.43728	0.0152845	1.27771	0.0335599	0.912581	0.182116
PTP4A3	protein tyrosine phosphatase type IVA, member 3	1.31963	4.94219e-15	1.36745	2.51431e-16	0.798548	1.36072e-05
PNMA2	PNMA family member 2	1.22198	1.35074e-52	1.22932	1.31257e-53	0.786629	4.33441e-21
SNX9	sorting nexin 9	1.12261	2.62979e-125	1.08549	2.47176e-117	0.990643	4.1306e-97
CYREN	cell cycle regulator of NHEJ	1.01172	7.91997e-25	1.18333	1.48976e-34	0.621716	0.000151691
Metabolic processes
CEMIP	cell migration inducing hyaluronidase 1	2.84767	6.12677e-42	2.95999	8.11508e-46	1.69538	1.06251e-13
SBK3	SH3 domain binding kinase family member 3	2.51184	0.00833277	3.1259	0.000434184	0.397255	0.812484
SULT1C4	sulfotransferase family 1C member 4	1.89089	2.76791e-78	1.90683	6.53157e-80	0.944079	7.88788e-19
SULT1A1	sulfotransferase family 1A member 1	1.46442	0.0722464	1.67311	0.0285422	0.921207	0.33347
ARSJ	arylsulfatase family member J	1.12557	2.42364e-93	1.06469	1.29374e-83	0.643595	8.07186e-30
AMT	aminomethyltransferase	1.24118	0.0730749	1.44512	0.0256367	0.564927	0.522972
NAMPT	nicotinamide phosphoribosyltransferase	1.12405	6.75725e-93	1.11693	6.25517e-92	0.119107	0.091888
ST6GAL1	ST6 beta-galactoside alpha-2,6-sialyltransferase 1	1.21778	4.82991e-63	1.26343	7.41685e-68	0.655774	1.67923e-18
ST6GALNAC3	ST6 N-acetylgalactosaminide alpha-2,6-sialyltransferase 3	1.0949	5.59948e-39	1.02592	2.69172e-34	0.726022	4.32492e-17
ST8SIA4	ST8 alpha-N-acetyl-neuraminide alpha-2,8-sialyltransferase 4	1.04784	4.96701e-36	1.03602	2.18697e-35	0.884755	1.63133e-25
Posttranslational protein regulation
ERO1B	endoplasmic reticulum oxidoreductase 1 beta	1.53574	6.18174e-44	1.63301	3.57719e-50	0.314496	0.0231624
DNAJC12	DnaJ heat shock protein family (Hsp40) member C12	1.50821	5.97893e-19	1.36635	1.42779e-15	-0.108527	0.722793
AK7	adenylate kinase 7	1.35794	0.0185397	1.06232	0.0796501	0.0224087	0.983236
PIM1	Pim-1 proto-oncogene, serine/threonine kinase	1.28443	3.59076e-39	1.25506	1.45988e-37	0.274877	0.0237589
PKIG	cAMP-dependent protein kinase inhibitor gamma	1.18045	1.17331e-89	1.11595	3.57149e-80	0.403883	1.43441e-10
HSPA13	heat shock protein family A (Hsp70) member 13	1.16723	1.11577e-62	1.06302	5.64604e-52	0.836133	5.30312e-32
NEK3	NIMA related kinase 3	1.13661	7.023e-32	1.08301	4.68392e-29	0.687443	1.4074e-11
HSPA5	heat shock protein family A (Hsp70) member 5	1.05013	1.46529e-79	1.11693	5.22135e-90	0.396732	7.91309e-12
Nervous system development
SEMA6D	semaphorin 6D	2.84121	2.72951e-257	2.96164	7.5737e-282	0.417313	5.52053e-05
RCAN1	regulator of calcineurin 1	2.59862	2.55969e-279	2.43068	6.52562e-244	0.811014	1.57591e-25
SEMA3A	semaphorin 3A	1.34403	0.0015639	1.50886	0.00022704	-0.0115992	0.93994
BTBD8	BTB domain containing 8	1.19428	2.37e-10	1.22301	5.97588e-11	0.364863	0.137237
STX1B	syntaxin 1B	1.72109	0.000180992	1.50457	0.00135152	0.424184	0.539394
ARHGAP26	Rho GTPase activating protein 26	1.10244	2.88897e-32	1.2207	5.55593e-40	0.630591	1.44578e-10
Transmembrane transport/Channels
KCNN2	potassium calcium-activated channel subfamily N member 2	1.44424	5.37925e-06	1.31676	4.12615e-05	0.855883	0.017846
SLC6A15	solute carrier family 6 member 15	1.37916	1.23855e-44	1.27809	2.6076e-38	0.834429	1.51938e-15
SLC39A14	solute carrier family 39 member 14	1.29927	1.44806e-68	1.27467	4.53431e-66	0.937535	1.77e-35
TMEM140	transmembrane protein 140	1.16871	3.69405e-47	1.27635	8.09999e-57	0.664884	4.5557e-15
CACNG6	calcium voltage-gated channel auxiliary subunit gamma 6	1.02498	1.35341e-20	1.10053	4.99313e-24	0.882685	3.44475e-15
Angiogenesis
ANGPT2	angiopoietin 2	1.68742	1.77509e-170	1.5853	2.41215e-150	-0.044611	0.661265
SEMA3E	semaphorin 3E	1.34403	0.0015639	1.50886	0.00022704	0.304441	0.641668
CITED2	Cbp/p300 interacting transactivator with Glu/Asp rich carboxy-terminal domain 2	1.1437	1.48113e-73	1.21903	5.09836e-84	0.496326	7.33103e-14
FILIP1L	filamin A interacting protein 1 like	1.05612	1.32606e-45	1.00746	1.33761e-41	0.874237	3.97039e-31
CALCRL	calcitonin receptor like receptor	1.01633	2.11378e-49	1.01533	2.55893e-49	0.742997	1.31505e-26
Immune system
TNIP3	TNFAIP3 interacting protein 3	1.80125	0.00136924	1.32914	0.0271283	0.140244	0.891824
CD55	CD55 molecule (Cromer blood group)	1.728	2.43162e-192	1.64938	3.19744e-175	0.720683	3.72786e-33
NFKB2	nuclear factor kappa B subunit 2	1.30429	3.32819e-33	1.14404	1.41581e-25	0.190012	0.197121
NFKBIZ	NFKB inhibitor zeta	1.27664	2.62077e-42	1.32033	1.47695e-45	0.147705	0.264396
SAMSN1	SAM domain, SH3 domain and nuclear localization signals 1	1.24836	1.5601e-13	1.1731	4.7837e-12	0.917599	2.26553e-07
Cell adhesion
VCAM1	vascular cell adhesion molecule 1	5.44546	2.19755e-56	5.17108	1.05665e-50	1.96317	1.24814e-06
SELE	selectin E	5.21028	6.5209e-247	5.32566	1.51484e-258	1.46347	6.33183e-16
C2CD4A	C2 calcium dependent domain containing 4A	3.80108	2.20955e-05	3.98879	6.51357e-06	1.73933	0.132276
C2CD4B	C2 calcium dependent domain containing 4B	1.99884	1.86096e-31	2.1043	2.18697e-35	0.423041	0.0738074
CDH15	cadherin 15	1.23989	0.0255947	1.56466	0.00233905	-0.529166	0.525273
Others
C6orf132	chromosome 6 open reading frame 132	3.81448	2.41496e-06	2.94277	0.000553093	1.91992	0.0530629
CD200	CD200 molecule	3.7355	3.2373e-117	3.68724	2.47129e-114	1.53046	1.26886e-16
RAB7B	RAB7B, member RAS oncogene family	2.99747	0.0117172	2.86022	0.0162048	1.53948	0.310362
SPRY1	sprouty RTK signaling antagonist 1	2.19204	0.000640025	2.68626	1.14131e-05	0.0167075	0.98915
MYOZ2	myozenin 2	1.96636	2.99347e-07	1.38664	0.000736598	0.344645	0.583721
EHD3	EH domain containing 3	1.88316	5.21988e-103	2.15198	3.25634e-136	0.881692	1.11627e-21
STPG3	sperm-tail PG-rich repeat containing 3	1.67083	0.034125	1.64336	0.034223	1.06609	0.248439
CCDC114	coiled-coil domain containing 114	1.55238	1.22061e-67	1.40288	6.49357e-55	0.141279	0.928718
SPATA6L	spermatogenesis associated 6 like	1.55148	1.25783e-15	1.39831	9.79193e-13	0.73036	0.00108694
SORBS1	sorbin and SH3 domain containing 1	1.54236	1.88756e-44	1.36073	2.44674e-34	0.437513	0.000994038
PRSS27	serine protease 27	1.53238	0.00619958	1.27811	0.0272221	0.330189	0.700181
OSCAR	osteoclast associated, immunoglobulin-like receptor	1.51606	0.0656426	1.43831	0.0779279	1.28875	0.139431
GULP1	GULP PTB domain containing engulfment adaptor 1	1.51175	2.18937e-51	1.41655	4.0545e-45	0.812698	1.89321e-14
TCP11L2	t-complex 11 like 2	1.4796	1.04031e-33	1.56021	1.16168e-37	0.959704	3.4039e-14
SMCO2	single-pass membrane protein with coiled-coil domains 2	1.47405	0.0162701	1.34006	0.0302416	0.0205452	0.98497
CAPN14	calpain 14	1.46028	3.08236e-06	1.5031	1.19773e-06	0.628348	0.10889
PCED1B	PC-esterase domain containing 1B	1.38252	1.05277e-08	1.26555	2.11515e-07	0.716204	0.00961031
RPGR	retinitis pigmentosa GTPase regulator	1.31158	1.76845e-25	1.1144	2.10492e-18	0.491962	0.000601279
WARS	tryptophanyl-tRNA synthetase	1.29289	1.03417e-138	1.28813	7.47391e-138	0.949601	1.39401e-74
LNP1	leukemia NUP98 fusion partner 1	1.25216	0.00848867	1.39901	0.00215809	0.447127	0.490449
IQCD	IQ motif containing D	1.2302	0.0109064	1.13256	0.0198383	0.237334	0.753117
THBD	thrombomodulin	1.19427	2.39493e-32	1.25493	6.18279e-36	0.256974	0.0394532
LCN12	lipocalin 12	1.12316	0.0418954	1.13336	0.0352326	-0.413201	0.619735
A2M	alpha-2-macroglobulin	1.10887	1.48811e-13	1.04804	3.28686e-12	0.621716	0.000151691
C17orf113	chromosome 17 open reading frame 113	1.08577	0.0755122	1.07201	0.0729213	0.739612	0.282034
N4BP2L1	NEDD4 binding protein 2 like 1	1.08518	0.00104449	1.0246	0.00199428	-0.344537	0.478405
RAI14	retinoic acid induced 14	1.06799	1.13808e-65	1.04828	2.89532e-63	0.821757	5.26602e-39
CPXM2	carboxypeptidase X, M14 family member 2	1.06708	8.88709e-25	1.18869	2.53225e-31	0.906864	1.06755e-17
COL4A3BP	collagen type IV alpha 3 binding protein	1.04561	6.34894e-57	1.07855	9.32333e-61	0.925092	1.14894e-22

## Sheet: 1B Down-regulated genes
Supplementary Table S1B: Down-regulated genes in hBMECs only after treatment with CM of TNBC
Gene Symbol	Gene Description	hBMEC MDA-MB-231-BR vs. hBMEC Ø		hBMEC MDA-MB-231 vs. hBMEC Ø		hBMEC MCF-7 vs. hBMEC Ø
DOWN-REGULATED		log2foldchange	padj	log2foldchange	padj	log2foldchange	padj
Transmembrane transport/Channels
GJA5	gap junction protein alpha 5	-4.64104	0.000288019	-2.99483	0.00313046	0.269125	0.781065
GJA4	gap junction protein alpha 4	-2.33871	0.00644646	-1.77594	0.0238486	0.0132902	0.989565
PLLP	plasmolipin	-1.50532	2.03587e-20	-1.32354	4.53152e-17	-0.447346	0.00554682
ATP2B3	ATPase plasma membrane Ca2+ transporting 3	-1.49405	0.0955799	-2.74745	0.00768269	0.199749	0.845718
FLRT2	fibronectin leucine rich transmembrane protein 2	-1.48535	3.32209e-153	-1.40931	8.49359e-139	-0.70123	2.33242e-35
SLC30A1	solute carrier family 30 member 1	-1.2817	3.03568e-62	-1.41521	3.58891e-75	-0.355545	7.22962e-06
MS4A6A	membrane spanning 4-domains A6A	-1.24225	0.000741905	-1.21101	0.000818814	-0.778385	0.0394661
TMEM37	transmembrane protein 37	-1.17807	0.000210059	-1.14167	0.000269147	-0.410366	0.256114
SLC5A3	solute carrier family 5 member 3	-1.15496	8.84599e-25	-1.24438	1.24042e-28	-0.796866	7.9381e-13
SLC16A9	solute carrier family 16 member 9	-1.14635	2.0989e-06	-1.16037	1.26051e-06	-0.809524	0.000956815
SLC43A2	solute carrier family 43 member 2	-1.05462	5.57461e-55	-1.00665	6.17541e-51	-0.393871	8.48125e-09
TMEM97	transmembrane protein 97	-1.02884	4.36765e-39	-1.01185	1.63856e-38	-0.746516	7.08534e-22
SLC35E4	solute carrier family 35 member E4	-1.01808	1.18558e-15	-1.14618	1.70674e-19	0.0181945	0.933018
Metabolic processes
HAS2	hyaluronan synthase 2	-2.93087	5.33684e-08	-3.38875	7.03683e-09	1.0039	0.00723859
LFNG	LFNG O-fucosylpeptide 3-beta-N-acetylglucosaminyltransferase	-2.89711	1.10992e-91	-2.6289	8.76207e-85	-1.20129	8.30964e-25
NDST3	N-deacetylase and N-sulfotransferase 3	-1.83021	0.00771516	-1.37492	0.0364354	-1.08653	0.112797
OGDHL	oxoglutarate dehydrogenase like	-1.80847	0.0443381	-1.4304	0.0928953	-0.904068	0.316866
FABP4	fatty acid binding protein 4	-1.78527	5.14885e-21	-1.86019	8.71945e-23	-0.922504	6.48176e-07
FAAH	fatty acid amide hydrolase	-1.77915	0.0062294	-1.57922	0.0116024	-0.819203	0.213568
ACSM3	acyl-CoA synthetase medium chain family member 3	-1.77299	6.23095e-34	-1.73311	1.61573e-33	-0.320161	0.0309504
B3GALT5	beta-1,3-galactosyltransferase 5	-1.75993	0.0703443	-2.65293	0.0130582	0.407193	0.682055
SPAAR	small regulatory polypeptide of amino acid response	-1.19631	2.57145e-19	-1.36601	1.45951e-24	-0.762108	7.99923e-09
SPNS2	sphingolipid transporter 2	-1.15218	4.10513e-66	-1.11692	6.34561e-63	-0.379611	2.83923e-08
LIPG	lipase G, endothelial type	-1.14749	1.34171e-86	-1.05617	1.96627e-74	0.843129	6.16967e-52
CHST15	carbohydrate sulfotransferase 15	-1.12829	8.75258e-25	-1.04335	6.65662e-22	-0.584873	9.60089e-08
Transcription/Translation regulation
WT1	Wilms tumor 1	-2.90957	0.0083013	-1.65243	0.0764642	-1.05605	0.283787
LUZP2	leucine zipper protein 2	-2.8126	0.00121553	-1.38449	0.0585964	-0.842939	0.285671
SNAI2	snail family transcriptional repressor 2	-2.81611	1.01349e-14	-2.73628	7.02691e-15	-0.136784	0.72518
ZNF750	zinc finger protein 750	-1.23707	0.00294931	-1.05922	0.00981091	-0.0426618	0.946143
ZNF66	zinc finger protein 66	-1.2264	0.00499798	-1.26587	0.00317458	-0.3125	0.55831
NT5DC3	5'-nucleotidase domain containing 3	-1.19181	5.29902e-13	-1.1684	8.06172e-13	-0.764491	2.85189e-06
ZSCAN31	zinc finger and SCAN domain containing 31	-1.16064	2.22121e-47	-1.13257	3.76935e-46	-0.921319	1.80757e-31
ZNF341	zinc finger protein 341	-1.15556	6.46547e-18	-1.08749	2.336e-16	-0.774067	6.16379e-09
FOXC2	forkhead box C2	-1.15499	1.18816e-65	-1.03374	1.33269e-54	-0.54457	1.51612e-16
POLR3H	RNA polymerase III subunit H	-1.04811	3.07454e-24	-1.15748	2.44879e-29	-0.500715	2.12315e-06
Nervous system development
SEMA3G	semaphorin 3G	-3.77573	3.18249e-137	-3.26233	3.00827e-129	-1.04126	2.42471e-22
ENC1	ectodermal-neural cortex 1	-2.46027	3.3104e-232	-2.31295	1.95365e-209	-0.00408795	0.976981
GPRIN3	GPRIN family member 3	-1.82952	2.43527e-35	-1.64014	1.63516e-30	-0.631935	5.19694e-06
EPHA7	EPH receptor A7	-1.66194	1.45046e-43	-1.54125	5.62897e-39	-0.262254	0.0450258
LRRTM2	leucine rich repeat transmembrane neuronal 2	-1.34431	0.0136189	-1.30032	0.0144544	-0.393143	0.531937
DRAXIN	dorsal inhibitory axon guidance protein	-1.32712	9.55191e-09	-1.00935	6.58283e-06	0.178757	0.525273
DNAAF1	dynein axonemal assembly factor 1	-1.22059	0.0825391	-1.2074	0.0755408	-0.891936	0.213892
DNAH8	dynein axonemal heavy chain 8	-1.1871	1.18621e-24	-1.15107	1.15153e-23	-0.374742	0.00205601
HTR1D	5-hydroxytryptamine receptor 1D	-1.09184	8.88846e-15	-1.1207	1.03544e-15	0.0372384	0.862698
PPFIBP2	PPFIA binding protein 2	-1.07787	8.57663e-16	-1.09335	1.81415e-16	-0.553859	3.57781e-05
Cellcycle/Apoptosis
STOX1	storkhead box 1	-2.45909	0.0146659	-1.52685	0.08525	-0.873422	0.355122
CARD9	caspase recruitment domain family member 9	-1.31082	4.98227e-05	-1.33994	2.73433e-05	-0.54829	0.112709
NDRG4	NDRG family member 4	-1.2768	1.70041e-124	-1.14803	4.16656e-102	-0.875879	3.04867e-60
CLSPN	claspin	-1.27177	4.01251e-37	-1.29747	6.75307e-39	-0.489633	1.30959e-06
CDC25A	cell division cycle 25A	-1.23935	9.11307e-24	-1.11698	2.88771e-20	-0.929938	1.60427e-14
MEIOC	meiosis specific with coiled-coil domain	-1.22123	0.0632491	-1.28996	0.0429046	-0.299098	0.703511
GINS3	GINS complex subunit 3	-1.11574	5.17199e-33	-1.05643	2.70284e-30	-0.838962	1.11931e-19
GMNN	geminin, DNA replication inhibitor	-1.00294	3.93032e-22	-1.18762	3.92153e-30	-0.947381	5.34828e-20
Signal transduction
GDF3	growth differentiation factor 3	-3.69088	5.82441e-22	-3.26114	3.75483e-21	-1.87029	1.08767e-10
DISP2	dispatched RND transporter family member 2	-1.20204	3.18562e-06	-1.06577	2.67928e-05	-0.596133	0.02615
INKA1	inka box actin regulator 1	-1.19433	3.22645e-16	-1.20094	1.26084e-16	-0.876948	1.42403e-09
NLRC3	NLR family CARD domain containing 3	-1.16738	5.48925e-14	-1.08263	1.48165e-12	0.40795	0.00776466
ARHGEF3	Rho guanine nucleotide exchange factor 3	-1.00971	8.48943e-48	-1.12097	1.50245e-58	-0.8435	3.34075e-34
Posttranslational protein regulation
MANSC4	MANSC domain containing 4	-1.36241	0.000159228	-1.71692	3.60394e-06	0.515579	0.122489
DNAJA1	DnaJ heat shock protein family (Hsp40) member A1	-1.25627	4.06628e-167	-1.27088	7.16779e-172	-0.942731	2.61229e-96
HSPH1	heat shock protein family H (Hsp110) member 1	-1.1878	8.20689e-81	-1.138	1.16614e-74	-0.9934	3.25234e-57
ARRDC4	arrestin domain containing 4	-1.18128	0.000104102	-1.37452	5.82275e-06	0.0790695	0.85474
cell adhesion
CHADL	chondroadherin like	-1.71792	0.00882242	-1.08633	0.0902594	-0.617938	0.3875
CDH6	cadherin 6	-1.10958	2.06519e-43	-1.04703	3.11157e-39	-0.685187	1.56527e-17
FAT3	FAT atypical cadherin 3	-1.09536	5.60762e-05	-1.15007	1.91301e-05	-0.472946	0.108093
EPB41L4B	erythrocyte membrane protein band 4.1 like 4B	-1.06836	0.0437527	-1.05145	0.0413085	-0.553671	0.336165
DNA Repair
EEPD1	endonuclease/exonuclease/phosphatase family domain containing 1	-2.69701	0.000465219	-1.59248	0.0175721	-1.10539	0.112556
FEN1	flap structure-specific endonuclease 1	-1.25731	4.06893e-57	-1.31922	5.53948e-63	-0.863803	4.15248e-29
Others
BMPER	BMP binding endothelial regulator	-2.87534	1.72028e-08	-2.30918	4.73065e-07	-1.65945	0.000145108
TXNIP	thioredoxin interacting protein	-2.63003	3.98241e-128	-1.83476	1.45227e-71	0.367939	0.000522744
COLEC10	collectin subfamily member 10	-2.33678	0.000147278	-1.4827	0.00568655	0.281079	0.649165
KIT	KIT proto-oncogene receptor tyrosine kinase	-2.2141	2.25764e-93	-2.38332	5.11964e-106	-0.2331	0.0428781
GRIP1	glutamate receptor interacting protein 1	-1.82129	0.0408724	-2.75442	0.00466207	-1.40165	0.111956
SHISA2	shisa family member 2	-1.61389	3.57587e-08	-1.47556	2.11154e-07	0.217977	0.516656
TG	thyroglobulin	-1.59612	0.00482806	-1.82502	0.0012702	-0.0792526	0.917963
GADL1	glutamate decarboxylase like 1	-1.58208	0.0248691	-3.04949	0.000448455	0.0843341	0.926019
MYLK2	myosin light chain kinase 2	-1.3663	6.33331e-15	-1.21739	9.19734e-13	0.808932	3.19422e-08
FAT1	FAT atypical cadherin 1	-1.35674	2.11301e-19	-1.30135	5.67641e-18	-0.0106292	0.970498
NHSL2	NHS like 2	-1.3527	5.23021e-70	-1.32433	1.04066e-67	-0.899004	2.72593e-32
PPP1R3C	protein phosphatase 1 regulatory subunit 3C	-1.3174	1.46826e-06	-1.06863	6.55485e-05	-0.54113	0.0611036
ARL4A	ADP ribosylation factor like GTPase 4A	-1.29552	3.37228e-43	-1.27694	2.10675e-42	-0.502896	1.60931e-07
PRR29	proline rich 29	-1.27838	1.48414e-63	-1.23362	1.44927e-60	-0.833892	1.91822e-29
SERTAD4	SERTA domain containing 4	-1.26723	1.4479e-14	-1.16807	6.81726e-13	-0.888666	5.48683e-08
ABTB2	ankyrin repeat and BTB domain containing 2	-1.2636	0.0007613	-1.11973	0.0022321	-0.0936737	0.854098
FILIP1	filamin A interacting protein 1	-1.24663	5.19798e-29	-1.14212	1.80198e-25	-0.0446112	0.788169
SPTB	spectrin beta, erythrocytic	-1.2456	0.0476084	-1.50642	0.0136905	-0.640191	0.352837
KIF4B	kinesin family member 4B	-1.17665	0.0693423	-1.08187	0.0865774	-0.707218	0.303102
NCOA5	nuclear receptor coactivator 5	-1.16282	6.15289e-78	-1.03389	1.74292e-63	-0.104403	0.170727
EHD1	EH domain containing 1	-1.15772	5.49776e-61	-1.18844	2.39749e-64	-0.391695	9.00049e-08
FAM110D	family with sequence similarity 110 member D	-1.09947	1.39022e-11	-1.1078	6.94461e-12	-0.659214	6.71541e-05
FLVCR2	feline leukemia virus subgroup C cellular receptor family member 2	-1.0828	0.0170216	-1.6348	0.000241612	-0.897663	0.053356
URB2	URB2 ribosome biogenesis homolog	-1.03764	2.2555e-13	-1.11727	2.1913e-15	-0.497033	0.000768033
KLRG1	killer cell lectin like receptor G1	-1.01474	4.87691e-12	-1.00141	5.22326e-12	-0.73079	5.49266e-07
